# Supplementary material for: Sex-based forearm morphology in climbers: an ultrasound study and it´s predictive value for climbing style
Source: Research Square preprint supplement (doi:10.21203/rs.3.rs-7530539/v1), 2025-10-08
Supplement: Supplementary file 1 [file e08bf84a01e0550e74c58fc5.xlsx]

## Sheet: Hoja1
	SEXO	EDAD	ALTURA	PESO	IMC	VOL ESC	ETTO ESPECIFICO	ETTO GNRAL	ACTIV EXTERNA	TIPO ESCALADA	GRADO ESCALADA	ANOS EXPERIENCIA	LESION MMSS	MOMENTO DE MEDICION	BR	PR	FSD	FPD	PC	NR	NM
1	0	44	1.76	68	21.95	5	0	0	0	0	2	8	1	0	16.68	13.47	8.39	8.62	13.75	8.65	12.69	DOMINANTE
2	4	30	1.62	52	19.81	7	1	0	0	0	1	4	1	1	13.09	8.01	9.39	11.37	8.39	9.72	8.35
3	4	38	1.67	53	19	3	1	1	0	0	1	1	0	0	12.75	12.32	8.28	9	9.55	8.29	8.97
4	0	43	1.65	52	19.1	7	1	0	1	0	1	8	0	0	14.96	14.46	10.94	11.71	10.6	9.46	10.73
5	0	44	1.66	79	28.67	9	1	0	0	0	3	8	0	0	19.32	11.29	12.92	13.97	16.13	7.78	9.94
6	0	37	1.67	64	22.95	7	0	1	0	0	0	0	0	2	16.95	11.93	8.61	11.44	10.89	6.6	9.51
7	0	26	1.84	63	18.61	9	1	0	0	1	7	4	1	0	16.29	11.26	10.55	14.24	13.31	7.06	8.52
8	0	42	1.8	72	22.22	5	1	1	1	0	1	4	1	2	21.31	12.57	12.26	14.47	11.98	10.09	8.75
9	0	37	1.79	66	20.6	7	1	1	0	0	1	4	0	2	18.61	12.52	11.7	14.14	12.81	6.72	10.45
10	0	25	1.8	74	22.84	5	1	0	1	0	0	0	1	2	20.6	15.88	14.75	16.23	14.03	8.14	10.87
11	0	37	1.71	65	22.23	1	1	1	0	0	1	0	1	2	17.4	8.97	10.77	13.97	12.7	7.05	9.55
12	4	27	1.62	46	17.53	1	1	1	0	0	1	4	1	2	14.36	7.6	10.44	11.21	8.72	9.61	9.52
13	4	39	1.74	68	22.46	1	1	1	0	0	1	0	1	0	13.09	7.69	7.62	10.33	10.16	9.22	9.9
14	0	43	1.83	85	25.38	1	1	1	0	0	1	1	0	2	17.56	12.38	10.71	12.59	14.47	9.69	11.75
15	0	29	1.78	78	24.62	3	1	1	0	0	1	1	0	1	18.55	11.71	13.31	13.47	12.87	7.76	9.82
16	4	45	1.59	44	17.4	3	1	1	0	0	1	0	1	0	9.61	7.81	8.45	9.72	8.39	8.6	10.16
17	4	32	1.7	57	19.72	3	1	1	0	0	0	0	1	0	11.27	10.11	9.44	11.71	8.39	6.77	10.67
18	0	42	1.72	66	22.31	7	1	1	0	1	6	8	0	1	17.16	10.45	13.86	16.89	11.54	9.16	10.32
19	0	39	1.66	52	18.87	7	1	1	0	0	2	4	0	1	15.29	11.71	10.45	13.92	11.04	6.72	9.81
20	0	41	1.65	57	20.94	1	1	1	0	0	2	6	1	2	13.59	7.43	8.72	15.18	14.19	8.03	8.93
21	4	45	1.7	60	20.76	9	1	1	0	0	1	1	1	2	9.17	9.73	10.93	9.94	10.22	9.58	10.54
22	4	41	1.63	58	21.83	1	1	1	1	0	0	0	1	1	12.65	9.2	9.17	10.71	9.5	8.72	9.69
23	4	44	1.5	47	20.89	0	0	1	0	0	1	0	1	1	13.25	8.07	11.04	10.16	9.94	7.05	11.54
24	0	45	1.77	100	31.92	3	1	1	1	0	1	1	0	1	22.59	11.53	14.35	15.34	13.95	11.11	11.41
25	4	44	1.65	70	25.71	3	1	1	0	0	1	4	1	1	9.94	7.93	9.17	12.59	11.15	8.69	10.3
26	4	41	1.65	62	22.77	9	0	1	0	1	5	0	1	0	14.96	7.62	9.22	11.7	11.59	7.43	9.3
27	0	28	1.65	54	19.83	9	0	0	0	0	3	4	0	1	16.45	10.11	11.48	14.41	11.26	11.21	9.22
28	0	27	1.75	64	20.9	9	1	0	0	0	2	6	1	0	18.22	11.97	15.74	16.12	13.91	7.03	10.6
29	4	51	1.55	50	20.81	1	1	1	0	0	2	8	1	2	12.16	10.55	11.37	12.97	11.98	7.6	9.7
30	0	35	1.8	64	19.75	5	0	1	1	0	2	6	1	1	16.84	13.6	12.59	14.85	16.62	7.23	11.76
31	4	40	1.6	53	20.7	3	0	0	0	0	2	6	0	1	10.99	9.92	10.22	12.53	10.05	6.07	9.15
32	0	49	1.77	81	25.85	5	0	1	0	1	5	4	0	0	15.74	10.87	12.98	16.78	14.19	8.46	11.38
33	0	27	1.64	74	27.51	7	1	1	0	0	2	0	1	0	19.05	7.6	15.79	18	15.79	8.87	13.45
34	0	31	1.85	80	23.37	7	1	1	1	1	7	1	1	0	20.32	11.95	12.49	17.78	13.59	9.52	10.45
35	0	40	1.79	76	23.72	7	1	1	0	1	6	8	1	1	25.85	11.92	16.07	18.67	13.59	9.1	10.18
36	4	43	1.74	61	20.15	0	1	0	0	1	5	4	1	0	11.93	12.73	10.06	11.55	9.11	6.97	10.07
37	0	18	1.73	55	18.38	1	1	1	1	0	2	0	1	2	16.35	10.18	15.08	12.93	11.32	7.34	9.5
38	0	57	1.63	78	29.36	5	1	1	0	1	6	8	1	0	17.84	11.66	15.14	17.18	14.86	8.84	10.45
39	0	45	1.79	76	23.72	3	1	1	0	1	5	4	0	1	19.94	12.12	13.26	15.3	15.07	8.55	10.61
40	4	26	1.57	53	21.5	1	1	1	0	0	1	0	1	2	15.97	9.88	12.7	13.31	9.39	8.25	10.28
41	0	45	1.75	85	27.76	7	1	1	1	0	2	1	0	2	19.82	13.06	17.63	17.56	15.19	8.54	10.21
42	0	47	1.78	80	25.25	7	1	1	0	1	6	8	1	1	16.68	10.82	14.25	16.63	13.97	11.31	13.49
43	0	24	1.73	72	24.06	9	0	1	0	1	7	4	1	0	18.66	10.94	16.9	17.78	15.74	7.76	10.66
44	4	26	1.54	53	22.35	9	1	0	1	1	6	1	1	1	12.76	10.3	12.04	12.38	11.32	8.4	10.87
45	0	44	1.72	73	24.68	3	1	1	0	1	5	8	0	1	17.67	13.86	14.03	17.4	14.91	10.08	11.2
46	0	44	1.7	60	20.76	9	1	0	0	1	6	8	0	0	17.56	9.94	12.31	13.87	12.86	7.72	10.61
47	0	42	1.78	67	21.15	5	1	1	0	1	6	8	0	2	22.04	11.24	16.73	18.94	16.23	8.88	11.18
48	4	43	1.65	56	20.57	1	1	1	1	1	6	4	1	1	12.15	9.13	11.65	17.29	14.13	7.53	10.87
49	0	30	1.88	73	20.65	5	0	0	1	0	2	0	0	2	22.31	15.33	18.11	15.57	14.03	9.77	13.45
50	0	22	1.73	61	20.38	9	0	0	0	1	7	4	0	0	16.01	10.97	13.8	16.07	13.64	9.23	11.39
1	0	44	1.76	68	21.95	5	0	0	0	0	2	8	1	0	14.92	11.82	13.14	11.76	14.08	8.84	10.82	NO DOMINANTE
2	4	30	1.62	52	19.81	7	1	0	0	0	1	4	1		13.14	9.37	8.51	8.78	10.44	7.91	9.47
3	4	38	1.67	53	19	3	1	1	0	0	1	1	0	0	11.59	7.31	9.77	8.5	7.51	8.51	8.94
4	0	43	1.65	52	19.1	7	1	0	1	0	1	8	0	0	17.01	9.66	11.26	15.41	12.48	6.94	9.11
5	0	44	1.66	79	28.67	9	1	0	0	0	3	8	0	0	19.16	13.87	13.31	14.08	14.96	8.57	8.57
6	0	37	1.67	64	22.95	7	0	1	0	0	0	0	0	2	16.45	7.97	8.23	12.32	10.77	7.9	8.26
7	0	26	1.84	63	18.61	9	1	0	0	1	7	4	1	0	17.83	10.52	10.27	12.86	12.09	6.3	8.89
8	0	42	1.8	72	22.22	5	1	1	1	0	1	4	1	2	21.92	14.03	11.98	13.58	11.76	9.15	10.75
9	0	37	1.79	66	20.6	7	1	1	0	0	1	4	0	2	18.39	9.93	12.59	13.42	13.25	6.67	10.05
10	0	25	1.8	74	22.84	5	1	0	1	0	0	0	1	2	22.19	14.18	15.08	17.84	13.86	7.83	9.93
11	0	37	1.71	65	22.23	1	1	1	0	0	1	0	1	2	14.41	9.45	10.94	14.03	11.43	7.66	8.96
12	4	27	1.62	46	17.53	1	1	1	0	0	1	4	1	2	12.7	9.06	8.5	10.83	9.11	8.86	9.28
13	4	39	1.74	68	22.46	1	1	1	0	0	1	0	1	0	14.86	9.97	7.45	10.05	8.56	9.33	9.32
14	0	43	1.83	85	25.38	1	1	1	0	0	1	1	0	2	18.5	13.37	10.38	12.48	12.92	9.01	10.08
15	0	29	1.78	78	24.62	3	1	1	0	0	1	1	0	1	17.39	10.17	11.7	13.36	13.86	10.26	10.37
16	4	45	1.59	44	17.4	3	1	1	0	0	1	0	1	0	9.39	7.58	6.41	8.67	8.5	7.31	9.3
17	4	32	1.7	57	19.72	3	1	1	0	0	0	0	1	0	10.44	8.94	8.12	10.1	9.39	6.4	9.47
18	0	42	1.72	66	22.31	7	1	1	0	1	6	8	0	1	19.11	11.67	12.92	14.47	12.65	8.08	10.09
19	0	39	1.66	52	18.87	7	1	1	0	0	2	4	0	1	14.08	11.17	11.32	13.58	10.21	6.69	9.16
20	0	41	1.65	57	20.94	1	1	1	0	0	2	6	1	2	10.93	7.92	11.82	13.53	10.77	9.6	7.33
21	4	45	1.7	60	20.76	9	1	1	0	0	1	1	1	2	10.77	10.79	9.89	11.1	9.72	11.77	9.04
22	4	41	1.63	58	21.83	1	1	1	1	0	0	0	1	1	12.42	8.82	8.17	11.16	10.49	10.71	7.84
23	4	44	1.5	47	20.89	0	0	1	0	0	1	0	1	1	12.98	8.31	12.2	13.09	9.06	10.33	7.36
24	0	45	1.77	100	31.92	3	1	1	1	0	1	1	0	1	23.08	12.26	14.36	16.14	13.59	12.06	8.09
25	4	44	1.65	70	25.71	3	1	1	0	0	1	4	1	1	11.7	7.49	9.61	10.43	10.49	9.56	8
26	4	41	1.65	62	22.77	9	0	1	0	1	5	0	1	0	15.74	7.87	10.71	13.31	11.71	10.11	9.97
27	0	28	1.65	54	19.83	9	0	0	0	0	3	4	0	1	17.17	12.05	10.71	15.74	10.88	7.91	9.72
28	0	27	1.75	64	20.9	9	1	0	0	0	2	6	1	0	16.29	11.07	14.91	17.61	16.52	10.63	8.94
29	4	51	1.55	50	20.81	1	1	1	0	0	2	8	1	2	11.48	7.89	9.83	11.49	10.33	10.25	7.2
30	0	35	1.8	64	19.75	5	0	1	1	0	2	6	1	1	17.45	10.72	11.98	13.25	14.19	10.17	6.94
31	4	40	1.6	53	20.7	3	0	0	0	0	2	6	0	1	12.09	12.71	9.83	10.82	10.88	9.39	8.13
32	0	49	1.77	81	25.85	5	0	1	0	1	5	4	0	0	18.28	8.31	12.2	12.87	13.14	10.03	8.19
33	0	27	1.64	74	27.51	7	1	1	0	0	2	0	1	0	20.54	10.2	13.42	16.34	15.02	11.19	7.05
34	0	31	1.85	80	23.37	7	1	1	1	1	7	1	1	0	18.77	10.61	14.2	15.91	16.35	8.78	19.24
35	0	40	1.79	76	23.72	7	1	1	0	1	6	8	1	1	26.5	10.94	14.63	19.56	14.6	11.61	9.94
36	4	43	1.74	61	20.15	0	1	0	0	1	5	4	1	0	10.99	9.77	8.23	9.55	8.33	8.43	10.41
37	0	18	1.73	55	18.38	1	1	1	1	0	2	0	1	2	17.06	10.03	13.25	14.25	10.5	7.35	10.65
38	0	57	1.63	78	29.36	5	1	1	0	1	6	8	1	0	17.9	11.91	16.24	17.57	13.99	11.15	12.45
39	0	45	1.79	76	23.72	3	1	1	0	1	5	4	0	1	18.4	10.06	12.71	20.46	14.09	10.57	11.65
40	4	26	1.57	53	21.5	1	1	1	0	0	1	0	1	2	14.92	9.5	11.44	12.32	10.6	7.51	9.27
41	0	45	1.75	85	27.76	7	1	1	1	0	2	1	0	2	20.71	12.79	13.31	16.02	14.64	8	11.13
42	0	47	1.78	80	25.25	7	1	1	0	1	6	8	1	1	18.95	12.24	11.27	15.63	13.53	7.82	11.33
43	0	24	1.73	72	24.06	9	0	1	0	1	7	4	1	0	19.27	10.75	16.07	15.63	16.64	8.51	10.48
44	4	26	1.54	53	22.35	9	1	0	1	1	6	1	1	1	11.93	8.97	11.21	11.41	9.72	7.44	9.52
45	0	44	1.72	73	24.68	3	1	1	0	1	5	8	0	1	17.01	11.57	12.09	19.16	13.69	7.62	12.24
46	0	44	1.7	60	20.76	9	1	0	0	1	6	8	0	0	16.51	8.53	11.87	17.19	11.37	9.82	10.41
47	0	42	1.78	67	21.15	5	1	1	0	1	6	8	0	2	20.77	12.63	15.41	18.46	17.23	7.01	11.64
48	4	43	1.65	56	20.57	1	1	1	1	1	6	4	1	1	10.77	10.21	9.94	14.85	9.72	8.76	10.93
49	0	30	1.88	73	20.65	5	0	0	1	0	2	0	0	2	18.39	12.1	14.74	19.44	14.41	9.95	12.51
50	0	22	1.73	61	20.38	9	0	0	0	1	7	4	0	0	17.61	11.06	12.43	16.18	13.97	8.7	10.39

## Sheet: Hoja2
		SEXO				ANOS DE EXPERIENCIA
		0	HOMBRE			0	1-2 ANOS
		4	MUJER			1	3-4 ANOS
						4	5-9 ANOS
						6	10-14 ANOS
		TIPO DE ESCALADA				8	15 o + ANOS
		0	BOULDER
		1	DEPORTIVO/CUERDA/ADHERENCIA
		GRADOS DE ESCALADA				VOL ESC
		0	5	BOULDER		0	1-1,5h/sem
		1	6			1	2-2,5h/sem
		2	7			3	3-3,5h/sem
		3	8			5	4-5h/sem
		4	5	DEPORTIVA		7	+5h/sem
		5	6			9	+10h/sem
		6	7
		7	8			ETTO ESPECIFICO
		8	9			0	SI
						1	NO
		ETTO GNRAL				ACTIV EXTERNA
		0	SI			0	SI
		1	NO			1	NO
		LESION MMSS				MOMENTO DE MEDICION
		0	SI			0	ANTES
		1	NO			1	DURANTE
						2	DESPUÉS
